# Supplementary material for: Clinical predictors and noninvasive imaging in Fontan-associated liver disease: A systematic review and meta-analysis
Source: PubMed Central journal article supplement (PMC11567714; doi:10.1097/hc9.0000000000000580), 2024-11-15
Supplement: hc9-8-e0580-s001.pdf [file hc9-8-e0580-s001.pdf]

# **Clinical Predictors and Non-Invasive Imaging in Fontan-Associated Liver Disease: A Systematic Review and Meta-Analysis**

**Short Title:** Liver Biopsy Versus Imaging in FALD

Jae Hee Seol<sup>1,2</sup>, Jin Young Song<sup>4</sup>, Su Jin Kim<sup>5</sup>, Hoon Ko<sup>6</sup>, Jae Yoon Na<sup>7</sup>, Min Jung Cho<sup>8</sup>, Hee Jung Choi<sup>9</sup>, Jue Seong Lee<sup>10</sup>, Kyung Jin Oh<sup>11</sup>, Jo Won Jung<sup>\*3</sup>, Se Yong Jung<sup>\*3</sup>

<sup>1</sup>. Department of Pediatrics, Yonsei University Wonju College of Medicine, Wonju, Republic of Korea

<sup>2</sup>. Department of Pediatrics, Yonsei University College of Medicine, Seoul, Republic of Korea

<sup>3</sup>. Division of Pediatric Cardiology, Department of Pediatrics, Congenital Heart Disease Center, Severance Cardiovascular Hospital, Yonsei University College of Medicine, Seoul, Republic of Korea

<sup>4</sup>. Department of Pediatrics, Samsung Medical Center, Sungkyunkwan University School of Medicine, Seoul, Republic of Korea

<sup>5</sup>. Department of Pediatrics, Sejong General Hospital, Buchun, Republic of Korea

<sup>6</sup>. Department of Pediatrics, Pusan National University Yangsan Hospital, Pusan National University School of Medicine, Yangsan, Republic of Korea

<sup>7</sup>. Department of Pediatrics, Hanyang University College of Medicine, Seoul, Republic of Korea

<sup>8</sup>. Department of Pediatrics, College of Medicine, Gyeongsang National University Changwon Hospital, Changwon, Geongsangnam-do, Republic of Korea

<sup>9</sup>. Department of Pediatrics, Keimyung University Dongsan Hospital, Keimyung University School of Medicine, Daegu, Republic of Korea

<sup>10</sup>. Department of Pediatrics, Korea University Anam Hospital, Korea University College of Medicine, Seoul, Republic of Korea

<sup>11</sup>. Department of Pediatrics, Seoul Metropolitan Government-Seoul National University Boramae Medical Center,

Seoul, Republic of Korea

**Abbreviations:** APRI, aspartate aminotransferase to platelet ratio index; CI, confidence interval; CT, computed tomography; CVP, central venous pressure; FALD, Fontan-associated liver disease; FIB-4, fibrosis-4 index; GGT, gamma-glutamyl transferase; INR, international normalized ratio; MELD-XI, Model for End-Stage Liver Disease Excluding International Normalized Ratio; MRE, magnetic resonance elastography; MRI, magnetic resonance imaging; RoBANS, risk of bias assessment tool for nonrandomized studies; SWE, shear wave elastography; TA, tricuspid atresia; TE, transient elastography; US, ultrasound

**Correspondence:**

Jung Jo-won, [jwjung@yuhs.ac](mailto:jwjung@yuhs.ac)

Jung Se-young, [jung811111@yuhs.ac](mailto:jung811111@yuhs.ac)

## Supplementary Table 1: Search Strategies

**Database:** PubMed

**Platform:** US National Library of Medicine

**Date Searched:** February 10, 2024 / **Date of Search Update:** April 10, 2024

**Other Limits/Filters:** Exclude publication types: editorial, commentary, protocol, case report, case series, reviews, letter

| Set | Concept               | Search Strategy                                                                                                                                                                                                                                                                                                                                                                               |
|-----|-----------------------|-----------------------------------------------------------------------------------------------------------------------------------------------------------------------------------------------------------------------------------------------------------------------------------------------------------------------------------------------------------------------------------------------|
| #1  | Fontan                | Fontan Procedure[mh] OR Fontan[tw]                                                                                                                                                                                                                                                                                                                                                            |
| #2  | Singe ventricle heart | Univentricular Heart/surgery[mh] OR univentricular heart*[tw] OR single ventric*[tw] OR hypoplastic left heart syndrome*[tw] OR left heart hypoplasia syndrome*[tw]                                                                                                                                                                                                                           |
| #3  |                       | #1 OR #2                                                                                                                                                                                                                                                                                                                                                                                      |
| #4  | Liver disease         | Liver Diseases[mh] OR liver disease*[tw] OR liver disorder*[tw] OR liver dysfunction*[tw] OR hepatic disease*[tw] OR hepatic disorder*[tw] OR liver cirrhosis[tw] OR hepatic cirrhosis[tw] OR cardiac cirrhosis[tw] OR hepatocellular carcinoma*[tw] OR hepatocellular carcinoma*[tw] OR liver cell carcinoma*[tw] OR hepatic cell carcinoma*[tw] OR adult liver cancer*[tw] OR hepatoma*[tw] |
| #5  |                       | #3 AND #4                                                                                                                                                                                                                                                                                                                                                                                     |
| #6  | US                    | Ultrasonography[mh] OR ultrasonograph*[tw] OR ultrasound[tw] OR ultrasonic*[tw]                                                                                                                                                                                                                                                                                                               |
| #7  | Elastography          | Elasticity Imaging Techniques[mh] OR elasticit*[tw] OR elastograph*[tw] OR vibroacoustograph*[tw] OR sonoelastograph*[tw] OR elastogram*[tw] OR acoustic radiation force impulse[tw] OR ARFI imaging[tw]                                                                                                                                                                                      |
| #8  | MRI                   | Magnetic Resonance Imaging[mh] OR magnetic resonance[tw] OR MR imaging[tw] OR MRI[tw]                                                                                                                                                                                                                                                                                                         |
| #9  | CT                    | Tomography, X-Ray Computed[mh] OR computed tomograph*[tw] OR CT scan*[tw] OR computer assisted tomograph*[tw] OR computerized tomograph*[tw]                                                                                                                                                                                                                                                  |
| #10 |                       | #6 OR #7 OR #8 OR #9                                                                                                                                                                                                                                                                                                                                                                          |
| #11 |                       | #5 AND #10                                                                                                                                                                                                                                                                                                                                                                                    |

|     |                  |                                                                                                                                                                       |
|-----|------------------|-----------------------------------------------------------------------------------------------------------------------------------------------------------------------|
| #12 | Limits & Filters | (Animals[mh] NOT Humans[mh]) OR Models, Animal[mh:noexp] OR Disease Models, Animal[mh] OR Animal Experimentation[mh]                                                  |
| #13 | Limits & Filters | Case Reports[pt] OR case stud*[tw] OR case report*[tw] OR case series[tw] OR ((cases[tw] OR case[tw]) NOT (case control*[tw] OR case match*[tw] OR case compar*[tw])) |
| #14 |                  | #11 NOT #12 NOT #13                                                                                                                                                   |

**Notes:** The limits for language (English) and publication year (1971–2023) were applied to the main search using the filters available in PubMed. The keywords were searched in the title field only (i.e., [Title]), title and abstract fields in PubMed (i.e., [Title/Abstract]), publication type field (i.e. [Publication Type]), and the controlled vocabulary terms are indicated with [Mesh]. Phrases were enclosed in quotation marks to force the searching of the exact terms in order presented. To these results, the search strategy to exclude publication types was applied.

**Database:** Embase

**Platform:** Elsevier

**Date Searched:** February 10, 2024 / **Date of Search Update:** April 10, 2024

**Date Limits:** 1971 – 2023 & 2023 – 2023;

**Other Limits/Filters:** Source: Embase & Embase Classic; Language: English; Exclude publication types: editorial, commentary, protocol, case report, case series, reviews, letter

| Set | Concept                | Search Strategy                                                                                                                                                                                                                                                                                         |
|-----|------------------------|---------------------------------------------------------------------------------------------------------------------------------------------------------------------------------------------------------------------------------------------------------------------------------------------------------|
| #1  | Fontan                 | 'fontan procedure'/exp OR 'fontan procedure' OR fontan:ti,ab,kw                                                                                                                                                                                                                                         |
| #2  | Single ventricle heart | 'heart single ventricle'/dm_su OR 'univentricular heart*':ti,ab,kw OR 'single ventric*':ti,ab,kw OR 'hypoplastic left heart syndrome*':ti,ab,kw OR 'left heart hypoplasia syndrome*':ti,ab,kw                                                                                                           |
| #3  |                        | #1 OR #2                                                                                                                                                                                                                                                                                                |
| #4  | Liver disease          | 'liver disease'/exp OR (((liver OR hepatic) NEXT/1 (disease* OR disorder* OR dysfunction* OR cirrhosis)):ti,ab,kw) OR 'cardiac cirrhosis':ti,ab,kw OR 'adult liver cancer*':ti,ab,kw OR hepatoma*':ti,ab,kw OR (((hepatocellular OR 'hepato cellular' OR liver OR hepatic) NEXT/2 carcinoma*):ti,ab,kw) |
| #5  |                        | #3 AND #4                                                                                                                                                                                                                                                                                               |
|     | US                     | 'echograph'/exp OR ultrasonograph*':ti,ab,kw OR echograph*':ti,ab,kw OR ultrasound:ti,ab,kw OR ultrasonic*':ti,ab,kw                                                                                                                                                                                    |
|     | Elastography           | 'echograph'/exp OR 'elastography'/exp OR elasticit*':ti,ab,kw OR elastograph*':ti,ab,kw OR 'vibro acoustograph*':ti,ab,kw OR sonoelastograph*':ti,ab,kw OR elastogram*':ti,ab,kw OR 'acoustic radiation force impulse':ti,ab,kw OR arfi:ti,ab,kw                                                        |
|     | MRI                    | 'echograph'/exp OR 'elastography'/exp OR 'nuclear magnetic resonance imaging'/exp OR 'magnetic resonance':ti,ab,kw OR 'mr imaging':ti,ab,kw OR mri:ti,ab,kw                                                                                                                                             |

|  |                  |                                                                                                                                                                                                                                                                |
|--|------------------|----------------------------------------------------------------------------------------------------------------------------------------------------------------------------------------------------------------------------------------------------------------|
|  | CT               | 'echograph'/exp OR 'elastography'/exp OR 'nuclear magnetic resonance imaging'/exp OR 'x-ray computed tomography'/exp OR 'computed tomograph*':ti,ab,kw OR 'ct scan*':ti,ab,kw OR 'computer assisted tomograph*':ti,ab,kw OR 'computerized tomograph*':ti,ab,kw |
|  |                  | #6 OR #7 OR #8 OR #9                                                                                                                                                                                                                                           |
|  |                  | #5 AND #10                                                                                                                                                                                                                                                     |
|  | Limits & Filters | 'animal'/exp NOT 'human'/exp OR 'animal model'/exp OR 'animal experiment'/exp OR [animal cell]/lim OR [animal experiment]/lim OR [animal model]/lim OR [animal tissue]/lim                                                                                     |
|  | Limits & Filters | 'case study'/de OR 'case report'/de                                                                                                                                                                                                                            |
|  |                  | #11 NOT #12 NOT #13                                                                                                                                                                                                                                            |
|  | Limits & Filters | #14 AND ('conference abstract'/it OR 'conference paper'/it OR 'conference review'/it)                                                                                                                                                                          |
|  |                  | #14 NOT #15                                                                                                                                                                                                                                                    |

**Database:** Cochrane

**Platform:** EBSCOhost

**Date Searched:** : February 10, 2024 / **Date of Search Update:** April 10, 2024

**Date Limits:** 1971 – 2023 & 2023 – 2023;

**Other Limits/Filters:** Source: Embase & Embase Classic; Language: English; Exclude publication types: editorial, commentary, protocol, case report, case series, reviews, letter

| Set | Concept                | Search Strategy                                                                                                                                                                                                                                                                                       |
|-----|------------------------|-------------------------------------------------------------------------------------------------------------------------------------------------------------------------------------------------------------------------------------------------------------------------------------------------------|
| #1  | Fontan                 | [mh "Fontan Procedure"] OR Fontan:ti,ab,kw                                                                                                                                                                                                                                                            |
| #2  | Single ventricle heart | [mh "Univentricular Heart"] OR (univentricular NEXT heart*):ti,ab,kw OR (single NEXT ventric*):ti,ab,kw OR ("hypoplastic left heart" NEXT syndrome*):ti,ab,kw OR ("left heart hypoplasia" NEXT syndrome*):ti,ab,kw                                                                                    |
| #3  |                        | #1 OR #2                                                                                                                                                                                                                                                                                              |
| #4  | Liver disease          | [mh "Liver Diseases"] OR ((liver OR hepatic) NEXT/1 (disease* OR disorder* OR dysfunction* OR cirrhosis)):ti,ab,kw OR ("cardiac cirrhosis" OR hepatoma*):ti,ab,kw OR (adult NEXT liver NEXT cancer*):ti,ab,kw OR ((hepatocellular OR hepato-cellular OR liver OR hepatic) NEXT/2 carcinoma*):ti,ab,kw |
| #5  |                        | #3 AND #4                                                                                                                                                                                                                                                                                             |

**Supplementary Table 2: PRISMA check list**

| Section and Topic             | Item # | Checklist item                                                                                                                                                                                                                                                                                       | Location where item is reported    |
|-------------------------------|--------|------------------------------------------------------------------------------------------------------------------------------------------------------------------------------------------------------------------------------------------------------------------------------------------------------|------------------------------------|
| <b>TITLE</b>                  |        |                                                                                                                                                                                                                                                                                                      |                                    |
| Title                         | 1      | Identify the report as a systematic review.                                                                                                                                                                                                                                                          | Title                              |
| <b>ABSTRACT</b>               |        |                                                                                                                                                                                                                                                                                                      |                                    |
| Abstract                      | 2      | See the PRISMA 2020 for Abstracts checklist.                                                                                                                                                                                                                                                         | Abstract                           |
| <b>INTRODUCTION</b>           |        |                                                                                                                                                                                                                                                                                                      |                                    |
| Rationale                     | 3      | Describe the rationale for the review in the context of existing knowledge.                                                                                                                                                                                                                          | Introduction                       |
| Objectives                    | 4      | Provide an explicit statement of the objective(s) or question(s) the review addresses.                                                                                                                                                                                                               | Introduction                       |
| <b>METHODS</b>                |        |                                                                                                                                                                                                                                                                                                      |                                    |
| Eligibility criteria          | 5      | Specify the inclusion and exclusion criteria for the review and how studies were grouped for the syntheses.                                                                                                                                                                                          | Methods                            |
| Information sources           | 6      | Specify all databases, registers, websites, organisations, reference lists and other sources searched or consulted to identify studies. Specify the date when each source was last searched or consulted.                                                                                            | Methods                            |
| Search strategy               | 7      | Present the full search strategies for all databases, registers and websites, including any filters and limits used.                                                                                                                                                                                 | Methods<br>Supplementary table 1   |
| Selection process             | 8      | Specify the methods used to decide whether a study met the inclusion criteria of the review, including how many reviewers screened each record and each report retrieved, whether they worked independently, and if applicable, details of automation tools used in the process.                     | Methods                            |
| Data collection process       | 9      | Specify the methods used to collect data from reports, including how many reviewers collected data from each report, whether they worked independently, any processes for obtaining or confirming data from study investigators, and if applicable, details of automation tools used in the process. | Methods                            |
| Data items                    | 10a    | List and define all outcomes for which data were sought. Specify whether all results that were compatible with each outcome domain in each study were sought (e.g. for all measures, time points, analyses), and if not, the methods used to decide which results to collect.                        | Methods                            |
|                               | 10b    | List and define all other variables for which data were sought (e.g. participant and intervention characteristics, funding sources). Describe any assumptions made about any missing or unclear information.                                                                                         | Methods<br>Funding; end of page    |
| Study risk of bias assessment | 11     | Specify the methods used to assess risk of bias in the included studies, including details of the tool(s) used, how many reviewers assessed each study and whether they worked independently, and if applicable, details of automation tools used in the process.                                    | Methods.<br>Supplementary Figure 1 |
| Effect measures               | 12     | Specify for each outcome the effect measure(s) (e.g. risk ratio, mean difference) used in the synthesis or presentation of results.                                                                                                                                                                  | results                            |
| Synthesis                     | 13a    | Describe the processes used to decide which studies were eligible for each synthesis (e.g. tabulating the study intervention characteristics                                                                                                                                                         | Methods                            |

| Section and Topic             | Item # | Checklist item                                                                                                                                                                                                                                                                       | Location where item is reported    |
|-------------------------------|--------|--------------------------------------------------------------------------------------------------------------------------------------------------------------------------------------------------------------------------------------------------------------------------------------|------------------------------------|
| methods                       |        | and comparing against the planned groups for each synthesis (item #5)).                                                                                                                                                                                                              |                                    |
|                               | 13b    | Describe any methods required to prepare the data for presentation or synthesis, such as handling of missing summary statistics, or data conversions.                                                                                                                                | Methods                            |
|                               | 13c    | Describe any methods used to tabulate or visually display results of individual studies and syntheses.                                                                                                                                                                               | Methods                            |
|                               | 13d    | Describe any methods used to synthesize results and provide a rationale for the choice(s). If meta-analysis was performed, describe the model(s), method(s) to identify the presence and extent of statistical heterogeneity, and software package(s) used.                          | Methods                            |
|                               | 13e    | Describe any methods used to explore possible causes of heterogeneity among study results (e.g. subgroup analysis, meta-regression).                                                                                                                                                 | Methods                            |
|                               | 13f    | Describe any sensitivity analyses conducted to assess robustness of the synthesized results.                                                                                                                                                                                         | Methods                            |
| Reporting bias assessment     | 14     | Describe any methods used to assess risk of bias due to missing results in a synthesis (arising from reporting biases).                                                                                                                                                              | Methods.<br>Supplementary Figure 1 |
| Certainty assessment          | 15     | Describe any methods used to assess certainty (or confidence) in the body of evidence for an outcome.                                                                                                                                                                                | Not conducted                      |
| <b>RESULTS</b>                |        |                                                                                                                                                                                                                                                                                      |                                    |
| Study selection               | 16a    | Describe the results of the search and selection process, from the number of records identified in the search to the number of studies included in the review, ideally using a flow diagram.                                                                                         | Results                            |
|                               | 16b    | Cite studies that might appear to meet the inclusion criteria, but which were excluded, and explain why they were excluded.                                                                                                                                                          | Results                            |
| Study characteristics         | 17     | Cite each included study and present its characteristics.                                                                                                                                                                                                                            | Results                            |
| Risk of bias in studies       | 18     | Present assessments of risk of bias for each included study.                                                                                                                                                                                                                         | Methods.<br>Supplementary Figure 1 |
| Results of individual studies | 19     | For all outcomes, present, for each study: (a) summary statistics for each group (where appropriate) and (b) an effect estimate and its precision (e.g. confidence/credible interval), ideally using structured tables or plots.                                                     | Results                            |
| Results of syntheses          | 20a    | For each synthesis, briefly summarise the characteristics and risk of bias among contributing studies.                                                                                                                                                                               | Results                            |
|                               | 20b    | Present results of all statistical syntheses conducted. If meta-analysis was done, present for each the summary estimate and its precision (e.g. confidence/credible interval) and measures of statistical heterogeneity. If comparing groups, describe the direction of the effect. | Results                            |
|                               | 20c    | Present results of all investigations of possible causes of heterogeneity among study results.                                                                                                                                                                                       | Results                            |
|                               | 20d    | Present results of all sensitivity analyses conducted to assess the robustness of the synthesized results.                                                                                                                                                                           | Not conducted                      |
| Reporting biases              | 21     | Present assessments of risk of bias due to missing results (arising from reporting biases) for each synthesis assessed.                                                                                                                                                              | Not conducted due to the inherent  |

| Section and Topic                              | Item # | Checklist item                                                                                                                                                                                                                             | Location where item is reported |
|------------------------------------------------|--------|--------------------------------------------------------------------------------------------------------------------------------------------------------------------------------------------------------------------------------------------|---------------------------------|
|                                                |        |                                                                                                                                                                                                                                            | limitation of non-RCT studies   |
| Certainty of evidence                          | 22     | Present assessments of certainty (or confidence) in the body of evidence for each outcome assessed.                                                                                                                                        | Not conducted                   |
| <b>DISCUSSION</b>                              |        |                                                                                                                                                                                                                                            |                                 |
| Discussion                                     | 23a    | Provide a general interpretation of the results in the context of other evidence.                                                                                                                                                          | Discussion                      |
|                                                | 23b    | Discuss any limitations of the evidence included in the review.                                                                                                                                                                            | Discussion                      |
|                                                | 23c    | Discuss any limitations of the review processes used.                                                                                                                                                                                      | Discussion                      |
|                                                | 23d    | Discuss implications of the results for practice, policy, and future research.                                                                                                                                                             | Discussion                      |
| <b>OTHER INFORMATION</b>                       |        |                                                                                                                                                                                                                                            |                                 |
| Registration and protocol                      | 24a    | Provide registration information for the review, including register name and registration number, or state that the review was not registered.                                                                                             | methods                         |
|                                                | 24b    | Indicate where the review protocol can be accessed, or state that a protocol was not prepared.                                                                                                                                             | methods                         |
|                                                | 24c    | Describe and explain any amendments to information provided at registration or in the protocol.                                                                                                                                            | methods                         |
| Support                                        | 25     | Describe sources of financial or non-financial support for the review, and the role of the funders or sponsors in the review.                                                                                                              | End of page                     |
| Competing interests                            | 26     | Declare any competing interests of review authors.                                                                                                                                                                                         | End of page                     |
| Availability of data, code and other materials | 27     | Report which of the following are publicly available and where they can be found: template data collection forms; data extracted from included studies; data used for all analyses; analytic code; any other materials used in the review. | End of page                     |



**Supplementary Table 3: Results of the association between hemodynamic parameters and liver fibrosis severity noted by imaging or liver Biopsy**

| Reference                | Study  | N (n)   | Population | Age at Ex(yr)*   | Duration after Fontan op(yr)* | Modality | Hemodynamic parameters <sup>†</sup>       |                                          |                                        |                                         |                                          |                                          |
|--------------------------|--------|---------|------------|------------------|-------------------------------|----------|-------------------------------------------|------------------------------------------|----------------------------------------|-----------------------------------------|------------------------------------------|------------------------------------------|
|                          |        |         |            |                  |                               |          | Fontan Pr (mmHg)                          | CVP (mmHg)                               | PVRI (WU/m2)                           | CI (L/min/m2)                           | PAWP (mmHg)                              | LVEDP (mmHg)                             |
| Silva-Sepulveda [9] 2019 | Retro. | 49      | both       | 17.8 (5-39)      | 15.2 (2-33)                   | Bx       | R=0.36, p=0.01                            |                                          | R=-0.152, p=0.30                       |                                         |                                          | R= 0.33, p=0.03                          |
| Borquez [22] 2021        | Retro. | 125     | both       | 15 (2–50.5)      | 12.7 (1–31)                   | Bx       | r=0.25, p<0.01                            |                                          |                                        |                                         |                                          |                                          |
| Evans [17] 2017          | Retro. | 30      | both       | 17 (6–45)        | 15 (1-29)                     | Bx       |                                           |                                          | R=0.1, p=0.76                          |                                         |                                          | R=-0.1 p=0.74                            |
| Kiesewetter [6] 2007     | Retro. | 11      | both       | 24.6 ±8          | 14.1±5.0                      | Bx       | mild vs severe<br>11±2 vs 16±6<br>p=0.14  |                                          |                                        |                                         |                                          | mild vs severe<br>6±2 vs 10±5,<br>p=0.23 |
| Wu [16] 2015             | Retro. | 68      | both       | 23.2 (5.0–52.7)  | 18.1 (1.2–32.7)               | Bx       |                                           | mild vs severe<br>17±4 vs 17±4<br>p=0.72 |                                        | mild vs severe<br>3±1 vs 3±1,<br>p=0.18 | mild vs severe<br>12±4 vs 13±6<br>p=0.46 |                                          |
| Emamallee [21] 2021      | Retro. | 106     | Ped        | 14.4 ± 3.5       | 10.8 ± 3.6                    | Bx       | mild vs severe<br>12±2 vs 14±4<br>p=0.23  |                                          | mild vs severe<br>2±1 vs 2±1<br>p=0.35 | mild vs severe<br>3±1 vs 3±2<br>p=0.37  |                                          | mild vs severe<br>7±2 vs 8±4<br>p=0.28   |
| Shin [23] 2022           | Retro. | 45      | adults     | 25.9 ± 6.5       | 20.8 ± 4.8                    | Bx       | mild vs severe<br>15±3 vs 14±3<br>p=0.46  |                                          |                                        |                                         |                                          | mild vs severe<br>9±3 vs 12±3<br>p=0.04  |
| Bütikofer [24] 2023      | Pros.  | 97 (50) | adults     | 25.9 (19.5-34.0) | 21.8 (16.7-27.8)              | Bx       | mild vs severe<br>11±3 vs 13±5<br>p=0.055 |                                          |                                        |                                         |                                          |                                          |

|                           |                 |         |        |                  |                  |     |                                                                    |                                          |                                     |                                    |                                       |                                      |
|---------------------------|-----------------|---------|--------|------------------|------------------|-----|--------------------------------------------------------------------|------------------------------------------|-------------------------------------|------------------------------------|---------------------------------------|--------------------------------------|
| Jarasvaraparn [26] 2024   | Retro.          | 66 (47) | both   | 24.3 ± 9.3       | 20.3 ± 7.1       | Bx  | mild vs severe<br>13±3 vs 16±5,<br>p=0.01<br><br>r=0.43,<br>p<0.01 |                                          |                                     |                                    |                                       |                                      |
| Shimizu [27] 2016         | Retro.          | 57      | both   | 23.3 ± 9.9       | 16.2±5.4         | CT  |                                                                    | no LC vs LC<br>13±2 vs 14±5<br>p=0.02    |                                     | no LC vs LC<br>2±1vs 2±1,<br>=0.64 |                                       |                                      |
| Nagasawa [28] 2022        | Retro.          | 27      | both   | 22.1± 9.4        | 18.3 ± 8.2       | CT  |                                                                    | mild vs severe<br>11±3 vs 13±3<br>p=0.06 |                                     |                                    |                                       |                                      |
| Song [29] 2018            | Retro.          | 26 (19) | both   | 13 (10.0-35.0)   | 10.5 (4-17)      | CT  |                                                                    |                                          | CPLD vs LC<br>1±1 vs 2±1,<br>p<0.05 |                                    | CPLD vs LC<br>12±2 vs 15±3,<br>p<0.05 | CPLD vs LC<br>10±4 vs 12±2<br>p=0.15 |
| Shiina [30] 2020          | Pros.           | 16      | adults | 31.3 ± 8.5       | Not assessed     | MRI |                                                                    | r=0.14,<br>p=0.62                        | r=-0.08,<br>p=0.79                  |                                    |                                       |                                      |
| De Lange [31] 2021        | cross-sectional | 27      | both   | 22.1± 9.4        | 18.3 ± 8.2       | MRI |                                                                    | r=0.5,<br>P<0.01                         |                                     |                                    |                                       | r=0.2,<br>p=0.45                     |
| Wallihan [32] 2014        | Retro.          | 14      | both   | 18.2 (9.1-45.9)  | 16.5 (6.9-32.9)  | MRE |                                                                    |                                          |                                     | R=-0.60<br>p=0.02                  |                                       |                                      |
| Sugimoto [33] 2016        | Pros.           | 16      | both   | 15.3 (6.5–30.4)  | 12.9 (4.4–23.3)  | MRE |                                                                    | r=0.8 p<0.01                             |                                     | r=-0.09,<br>p=0.42                 |                                       |                                      |
| Poterucha [15] 2015       | Retro.          | 50 (30) | adults | 25 (21-33)       | 22 (16-26)       | MRE | R=0.41,<br>p=0.03                                                  |                                          | R=0.53,<br>p<0.01                   | R=0.43,<br>p=0.02                  |                                       |                                      |
| Silva-Sepulveda [19] 2019 | Retro.          | 49 (28) | both   | 17.8 (5-39)      | 15.2 (2-33)      | MRE | R=0.59,<br>p<0.01                                                  |                                          | R=0.21,<br>p=0.31                   | R=0.09,<br>p=0.65                  |                                       | R=0.15,<br>p=0.47                    |
| Alsaied [34] 2019         | Retro.          | 70 (46) | adults | 24.7(21.6-32.1)  | 17.9 (15.1-23.4) | MRE | r=0.34,<br>p=0.03                                                  |                                          |                                     |                                    |                                       | r=-0.54,<br>p=0.02                   |
| Koizumi [35] 2001         | Pros.           | 43      | both   | 17.0 (12.0–25.0) | 15.3 (9.7–21.7)  | SWE | r=0.20,<br>p=0.24                                                  |                                          |                                     | r=-0.15,<br>p=0.39                 | r=0.26,<br>p=0.14                     |                                      |

|                     |                 |         |        |                  |                  |     |                     |                    |                   |                    |                   |                    |
|---------------------|-----------------|---------|--------|------------------|------------------|-----|---------------------|--------------------|-------------------|--------------------|-------------------|--------------------|
| Kim[36] 2018        | Retro.          | 64      | both   | 17.6 ± 5.3       | 12.1 ± 4.0       | SWE |                     | R=0.34,<br>p<0.01  | R=0.03<br>p=0.83  |                    |                   | R=0.33,<br>p<0.01  |
| Terashi [37] 2019   | cross-sectional | 79      | Ped    | 10.3 ± 4.9       | Not assessed     | SWE |                     | R=0.78<br>p<0.00   |                   | R=0.45<br>p<0.001  |                   |                    |
| De Lange [31] 2021  | Pros.           | 43/45   | Ped    | 16.5 (15.4-17.9) | 13.8 ± 2.9       | SWE |                     | r=0.2,<br>p=0.3    |                   |                    |                   | r=0.03,<br>p=0.9   |
| Nagasawa [28] 2022  | cross-sectional | 27      | both   | 22.1 ± 9.4       | 18.3 ± 8.2       | SWE |                     | r=0.31,<br>p=0.16  |                   |                    |                   |                    |
| Kutty [13] 2013     | Pros.           | 41 (16) | both   | 13.8 ± 6.3       | 11 ± 6           | SWE |                     |                    | T=1.64,<br>p=0.12 | T=0.13,<br>p=0.90  | T=3.01,<br>p=0.09 | T=4.29,<br>p=0.001 |
| Koizumi [35] 2001   | Pros.           | 43      | both   | 17.0 (12.0–25.0) | 15.3 (9.7–21.7)  | TE  | r=0.3<br>p=0.08     |                    |                   | r=-0.02,<br>p=0.90 | r=0.06,<br>p=0.74 |                    |
| Wu [14] 2014        | Retro. & Pros.  | 50 (49) | both   | 13.1 (2.4–57.7)  | 9.9 (0.1–32.5)   | TE  | R=0.31,<br>p=0.04   |                    | R=0.34,<br>p=0.03 | R=-0.33,<br>p=0.03 | R=0.18,<br>p=0.24 |                    |
| Chen [38] 2016      | Pros.           | 22      |        | 13.7 (5.9–16.8)  | 9.6 (1.0–12.9)   | TE  | R= 0.35,<br>p= 0.11 |                    |                   |                    |                   |                    |
| Rathgeber [39] 2020 | Pros.           | 76      | Ped    | 11.7 (8.4–14.8)  | 8.4 (4.6–11.4)   | TE  | r=0.32,<br>p=0.3    |                    |                   |                    |                   |                    |
| Shin [23] 2022      | Retro.          | 45      | adults | 25.9 ± 6.5       | 20.8 ± 4.8       | TE  | r=0.2,<br>p=0.34    |                    |                   |                    |                   | r=-0.05,<br>p=0.99 |
| Bütikofer [24] 2023 | Pros.           | 97 (94) | adults | 23.1 (18.7-30.6) | 18.3 (15.3-25.8) | TE  | R=0.36,<br>p=0.01   |                    |                   |                    |                   |                    |
| Emi [40] 2023       | Retro.          | 24      | adults | 35 (25–39)       | 27 (19–33)       | TE  |                     | r=0.83,<br>p<0.001 |                   |                    |                   |                    |

\* mean ± SD or median (range or interquartile range).

†Statistics : R, Pearson correlation coefficient; r, Spearman's rank correlation; T, linear regression

CI, cardiac index; CT, computerized tomography; Ex, examination; MRE, magnetic resonance elastography; CVP, central venous pressure; LVEDP, left ventricular end-diastolic pressure; MRI, magnetic resonance imaging; N, total number of patients; n, number of cases underwent testing; PAWP, pulmonary arterial wedge pressure; Ped, pediatrics; Prosp, prospective; PVRI, pulmonary vascular resistance index; Retro, retrospective; SWE, shear wave elastography; TE, transient elastography

**Supplementary Table 4: Results of the association between biochemical parameters and liver fibrosis severity noted by imaging or liver Biopsy.**

| Reference               | Study           | N (n)    | Population | Age at Ex(yr)*   | Duration after Fontan op (yr)* | Modality | Biochemical parameters                |                                       |                                        |                                          |                                             |                                            |
|-------------------------|-----------------|----------|------------|------------------|--------------------------------|----------|---------------------------------------|---------------------------------------|----------------------------------------|------------------------------------------|---------------------------------------------|--------------------------------------------|
|                         |                 |          |            |                  |                                |          | AST<br>Mild / Severe<br>IU/L          | ALT<br>Mild / Severe<br>IU/L          | ALP<br>Mild / Severe<br>IU/L           | GGT<br>Mild / Severe<br>IU/L             | Bil<br>Mild / Severe<br>mg/dL               | Albu.<br>Mild / Severe<br>g/L              |
| Wu [16] 2015            | Retro.          | 68       | both       | 23.2 (5.0–52.7)  | 18.1 (1.2–32.7)                | Bx       | 30(25-38) vs<br>33(26-42)<br>p=0.47   | 25(17-34) vs<br>27(20-51)<br>p=0.33   | 92(72-116) vs<br>101(89-188)<br>p=0.04 | 70 (46–96) vs<br>76(53-132)<br>p=0.52    | 1.0(0.5-1.3) vs<br>0.9(0.6–1.6),<br>p=0.73  | 4.1(3.7-4.4) vs<br>4.0(3.3-4.4)<br>p=0.46  |
| Munsterman [18] 2019    | Pros.           | 38       | adults     | 27 ± 6.6         | 21.4 ± 5.5                     | Bx       | 28(23-33) vs<br>28(25-35)<br>p=0.551  | 28(24-33) vs<br>28(23-37)<br>p=0.915  | 70(54-97) vs<br>81(70-96)<br>p=0.105   | 58(46-104) vs<br>62(49-121)<br>p=0.636   | 0.8(0.6-1.1) vs<br>0.9 (0.6-1.3)<br>p=0.761 | 41(40-43) vs<br>42(40-44)<br>p=0.529       |
| Emamaullee [21] 2021    | Retro.          | 106      | Ped        | 14.4 ± 3.5       | 10.8 ± 3.6                     | Bx       | 33 ± 8.4 vs<br>37±12.5,<br>p=0.17     | 35±9.7 vs<br>36±12.5,<br>p=0.97       |                                        | 64(37-82) vs<br>57(35-89)<br>p=0.98      | 0.9 ± 0.7 vs<br>1.7±2.2<br>p<0.01           | 37 ± 6 vs<br>38 ± 6<br>p=0.11              |
| Shin [23] 2022          | Retro.          | 45       | adults     | 25.9 ± 6.5       | 20.8 ± 4.8                     | Bx       | 22±5 vs<br>27±10,<br>p=0.67           | 24±10 vs<br>26±15,<br>p=0.67          | 83.2±29.3 vs<br>73.2±17.7,<br>p=0.19   | 76±59 vs<br>68±43,<br>p=0.64             | 1.1±0.4 vs<br>1.4±0.7,<br>p=0.35            |                                            |
| De Miguel [25] 2023     | Retro.          | 159 (31) | adults     | 31.5±9.3         | Not assessed                   | Bx       |                                       |                                       |                                        |                                          |                                             |                                            |
| Bütikofer [24] 2023     | Pros.           | 50 (47)  | adults     | 25.9 (19.5-34.0) | 21.8 (16.7-27.8)               | Bx       |                                       |                                       |                                        |                                          |                                             |                                            |
| Jarasvaraparn [26] 2024 | Retro.          | 66       | both       | 24.3±9.3         | 20.3±7.1                       | Bx       |                                       |                                       |                                        |                                          |                                             |                                            |
| Baek [42] 2010          | cross-sectional | 139      | both       | 19.0±6.3         | 11.5±4.7                       | CT       |                                       |                                       |                                        |                                          |                                             |                                            |
| Shimizu [27] 2016       | Retro.          | 57       | both       | 23.3±9.8         | 16.2±5.4                       | CT       | 24 (19–36) vs<br>27 (22–32)<br>p=0.59 | 24 (18–28) vs<br>28 (19–35)<br>p=0.34 |                                        | 63 (44–87) vs<br>115 (84–157)<br>p<0.001 | 1.0 (0.7–1.5) vs<br>0.9(0.5–1.5)<br>p=0.76  | 4.6 (4.4–4.8) vs<br>4.4(4.1–4.8)<br>p=0.18 |
| Song [29] 2018          | Retro.          | 26 (19)  | both       | 13 (10.0-35.0)   | 10.5 (4-17)                    | CT       | 25.6±5.6 vs<br>24.8±7.3<br>p=0.831    | 24.1±7.1 vs<br>21.6±6.5<br>p= 0.70    |                                        | 71.5±37.4 vs<br>73.3 ± 27.1<br>p=0.66    | 0.81±0.91 vs<br>0.78 ± 0.43<br>p=0.55       | 4.7±0.3 vs<br>4.7±0.2<br>p= 0.890          |
| Wolff [43] 2016         | cross-sectional | 59       | both       | 19.1 ± 7.5       | 13.2 ± 7.7                     | MRI      | R=-0.17,<br>p=0.20                    | R=-0.44,<br>P<0.01                    | r=0.223, p=0.136                       | r=-0.441,<br>p=0.01                      | r=-0.28,<br>p=0.06                          | r=-0.139,<br>p=0.303                       |
| Shiina [30] 2020        | Pros.           | 16       | adults     | 31.3 ± 8.5       | Not assessed                   | MRI      |                                       |                                       |                                        | r=-0.61,<br>p=0.01                       |                                             | r=-0.45,<br>p=0.07                         |
| Poterucha [15] 2015     | Retro.          | 50       | adults     | 25 (21-33)       | 22 (16-26)                     | MRE      |                                       |                                       |                                        | R=0.47,<br>p=0.03                        |                                             |                                            |

|                      |                 |           |        |                  |                  |     |                                   |                                   |                |                                 |                                         |                                       |
|----------------------|-----------------|-----------|--------|------------------|------------------|-----|-----------------------------------|-----------------------------------|----------------|---------------------------------|-----------------------------------------|---------------------------------------|
| Alsaied [34] 2019    | Retro.          | 70        | adults | 24.7 (21.6-32.1) | 17.9 (15.1-23.4) | MRE | R = 0.35, p = 0.02                | R = 0.37, p = 0.02                |                | R = 0.37, p = 0.03              |                                         |                                       |
| Koizumi [35] 2001    | Pros.           | 43        | both   | 17.0 (12.0-25.0) | 15.3 (9.7-21.7)  | SWE | r = -0.02 p = 0.91                | r = 0.23 p = 0.13                 |                | r = 0.15 p = 0.33               |                                         | r = 0.24 p = 0.13                     |
| Evans [17] 2017      | Retro.          | 30        | both   | 17 (6-45)        | 15(1-29)         | SWE |                                   |                                   |                |                                 |                                         |                                       |
| Kim [36] 2018        | Retro.          | 64        | both   | 17.6±5.3         | 12.1 ± 4.0       | SWE | R=0.16, p=0.22                    | R=0.20, p=0.121                   |                | R=0.30, p=0.03                  | R=-0.21, p=0.09                         | R=-0.09, p=0.49                       |
| Terashi [37] 2019    | cross-sectional | 79        | Ped    | 10.3±4.9         | Not assessed     | SWE | R=0.10, p=0.401                   | R=0.14, p=0.24                    |                | R=0.56, p<0.001                 | R=0.374, p<0.001                        |                                       |
| Smaś-Suska [44] 2019 | Retro.          | 54        | adults | 28.1 ± 19.0      | 20.4 ± 18.6      | SWE | 22(16-60) vs 28.5(16-41) p= 0.005 | 24.5(11-57) vs 28.5(11-51) p=0.08 |                | 59(25-170) vs 84(28-255) p=0.01 | 19.7(9.5-61.6) vs 20.5 (3.5-135) p=0.35 | 43 (31.5-50) vs 43 (20.5-48.7) p=0.72 |
| An [45] 2020         | cross-sectional | 66        | adults | 27.8 ± 6.1       | Not assessed     | SWE | R=-0.50, p <0.01                  | R=0.40, p = 0.02                  |                | R= 0.40 p =0.03                 |                                         |                                       |
| Nagasawa [28] 2022   | cross-sectional | 27        | both   | 22.1± 9.4        | 18.3 ± 8.2       | SWE | r=0.26, p=0.20                    | r=0.14, p=0.47                    | r=0.07 p=0.74  | r=0.14 p=0.49                   |                                         | r=0.34, p=0.081                       |
| Gill [46] 2023       | Pros.           | 25        | adults | 22 (18-29)       | 18.6±6.2         | SWE |                                   |                                   |                |                                 |                                         |                                       |
| Wu [14] 2014         | Retro. & Pros   | 50 (49)   | both   | 13.1 (2.4-57.7)  | 9.9 (0.1-32.5)   | TE  |                                   |                                   |                |                                 |                                         |                                       |
| Fidai [47] 2017      | cross-sectional | 27        | both   | 13.5±6.4         | 8.7±2.5          | TE  |                                   |                                   |                |                                 |                                         |                                       |
| Wilson [48] 2018     | cross-sectional | 152 (133) | both   | 19.8±9.3         | 14.1±7.6         | TE  |                                   |                                   |                | r=0.22, p=0.01                  | r=0.23, p=0.01                          |                                       |
| Song [29] 2018       | Retro.          | 26        | both   | 13 (10.0-35.0)   | 10.5 (4-17)      | TE  |                                   |                                   |                |                                 |                                         |                                       |
| Rathgeber [39] 2020  | Pros.           | 76        | Ped    | 11.7 (8.4-14.8)  | 8.4 (4.6-11.4)   | TE  | r=-0.45, p<0.01                   | r=-0.20, p=0.09                   | r=-0.14, p=0.2 | r=0.04, p=0.7                   | r=0.08, p=0.8                           | r=0.06, p=0.6                         |
| Shin [23] 2022       | Retro.          | 45        | adults | 25.9 ± 6.5       | 20.8 ± 4.8       | TE  | r=0.12 p=0.463                    | r=0.68, p=0.67                    | r=0.30 p=0.06  | r=0.01, p=0.95                  | r=0.26 p=0.25                           | r=0.03 p=0.32                         |
| Bütikofer [24] 2023  | Pros.           | 97 (94)   | adults | 23.1 (18.7-30.6) | 18.3 (15.3-25.8) | TE  |                                   |                                   |                |                                 |                                         |                                       |
| Gill [46] 2023       | Pros.           | 25        | adults | 22 (18-29)       | 18.6±6.2         | TE  |                                   |                                   |                |                                 |                                         |                                       |

## Supplementary Table 4: Results of the association between biochemical parameters and liver fibrosis severity noted by imaging or liver Biopsy.

(continue)

| Reference                  | Biochemical parameters <sup>†</sup> |                                                                      |                                           |                                             |                                                           |                                              |
|----------------------------|-------------------------------------|----------------------------------------------------------------------|-------------------------------------------|---------------------------------------------|-----------------------------------------------------------|----------------------------------------------|
|                            | INR                                 | Plt<br>x 10 <sup>3</sup> /μL                                         | APRI                                      | MELD-XI                                     | Fib-4                                                     | Fons index                                   |
| Wu [16] 2015               |                                     | 171 (127-217)<br>vs 164.5(110-218)<br>p=0.66                         |                                           | 9.9(9.4–12) vs<br>10.2(9.4–13.7)<br>p=0.58  |                                                           |                                              |
| Munsterman<br>[18] 2019    |                                     | 164(137-186)<br>vs 155(136-191)<br>p=0.96                            | 0.4(0.4-0.5) vs<br>0.4(0.4-0.6)<br>p=0.53 | 9.4(9.4-11.0) vs<br>9.4(9.4-11.1)<br>p=0.87 |                                                           |                                              |
| Emamaullee<br>[21] 2021    | 1.6±1.0 vs<br>1.7±0.7,<br>p=0.04    | 204±65.8<br>vs 168±58.4<br>p=0.01                                    | 0.4±0.1 vs<br>0.5±0.3,<br>p<0.01          | 10.4 ± 2.1 vs<br>11.6±3.8,<br>p=0.02        | 0.4±0.2 vs<br>0.6±0.4,<br>p<0.01                          |                                              |
| Shin [23] 2022             | 1.1± 0.04 vs<br>1.3±0.3,<br>p=0.01  | 207±50<br>vs 177±50,<br>p=0.11                                       |                                           |                                             |                                                           |                                              |
| De Miguel [25]<br>2023     |                                     |                                                                      | 0.42 ±0.28 vs<br>0.63±0.39, p=0.34        |                                             | 1.2 ±1.9 vs<br>1.5 ±0.8<br>p=0.12                         |                                              |
| Bütikofer [24]<br>2023     |                                     | 171(112-229)<br>vs 167(135-226)<br>p=0.68                            |                                           | r=0.127,<br>p=0.23                          |                                                           |                                              |
| Jarasvaraparn<br>[26] 2024 | 1.3 ±0.4 vs<br>1.4± 0.4<br>p=0.53   | 197.65 ±69.02 vs<br>150.89 ±60.65<br>p=0.003<br><br>r=-0.41, p=0.001 | 0.32 ±0.14 vs<br>0.64 ±0.78<br>p=0.02     | 9.88 ±1.36 vs<br>11.34 ±4.24<br>p=0.05      | 0.71 ±0.42 vs<br>1.07±0.71, p=0.01<br><br>r=0.36, p=0.002 |                                              |
| Baek [42] 2010             |                                     |                                                                      | 0.41±0.28 vs<br>1.19±4.01, =0.003         |                                             |                                                           | 0.04±3.89 vs<br>3.68±2.11<br>p=0.001         |
| Shimizu [27]<br>2016       |                                     | 17.9(14.0–20.8) vs<br>14.9(9.3–19.4)<br>p=0.14                       |                                           |                                             |                                                           | 6.8(4.4–10.7) vs<br>11.5(8.0–18.6)<br>p<0.01 |
| Song [29] 2018             |                                     | 220±75 vs<br>219±46<br>p= 0.58                                       |                                           |                                             |                                                           |                                              |
| Wolff [43] 2016            |                                     | r=0.01,<br>p=0.97                                                    |                                           | r=-0.29,<br>p=0.05                          | r=-0.32,<br>p=0.02                                        |                                              |
| Shiina [30]<br>2020        |                                     | r=0.001,<br>p=0.99                                                   |                                           | r=0.51,<br>p=0.04                           |                                                           |                                              |
| Poterucha [15]<br>2015     |                                     |                                                                      |                                           | R=0.48, p=0.002                             |                                                           |                                              |
| Alsaied [34]<br>2019       |                                     | R= -0.3,<br>p= 0.04                                                  |                                           |                                             |                                                           |                                              |
| Koizumi [35]<br>2001       |                                     | r= - 0.20<br>p= 0.05                                                 | r=0.21,<br>p=0.19                         |                                             | r= 0.25<br>p=0.11                                         |                                              |
| Evans [17]<br>2017         |                                     |                                                                      | p >0.05                                   | R=0.4,<br>P<0.003                           |                                                           |                                              |
| Kim [36] 2018              | r=-0.137, p=0.279                   | R=-0.02,<br>p=0.99                                                   |                                           |                                             |                                                           |                                              |

|                      |                  |                  |                                      |                                 |                                      |                               |
|----------------------|------------------|------------------|--------------------------------------|---------------------------------|--------------------------------------|-------------------------------|
| Terashi [37] 2019    |                  | R=0.39, p<0.001  |                                      |                                 |                                      |                               |
| Smaš-Suska [44] 2019 |                  |                  | 0.3(0.2–0.6) vs 0.5(0.2–1.5) p=0.003 | 9.1 (1–15) vs 10(1.1–19) p=0.13 | 0.6 (0.3–1.8) vs 0.9(0.3–3.2) p=0.02 | 3.9 (1.6) vs 4.8 (1.9) p=0.05 |
| An [45] 2020         |                  |                  | <0.05                                |                                 | <0.05                                |                               |
| Nagasawa [28] 2022   |                  | r=-0.31, p=0.12  |                                      |                                 | r=0.308, p=0.12                      |                               |
| Gill [46] 2023       |                  |                  | R=-0.18, p=0.14                      | R=0.18, p=0.14                  | R=0.14, p=0.20                       |                               |
| Wu [14] 2014         |                  | R=-0.29, p=0.05  |                                      |                                 |                                      |                               |
| Fidai [47] 2017      |                  |                  | r = 0.36, p= 0.01                    |                                 |                                      |                               |
| Wilson [48] 2018     |                  | r=-0.33, p<0.001 |                                      | r=0.25, p=0.01                  |                                      |                               |
| Song [29] 2018       |                  | r=-0.47, P=0.02  |                                      |                                 |                                      |                               |
| Rathgeber [39] 2020  |                  | r=-0.39, p<0.01  | r=0.26, p=0.04                       |                                 |                                      |                               |
| Shin [23] 2022       | r=0.257, p=0.101 | r=-0.05, p=0.77  |                                      |                                 |                                      |                               |
| Bütikofer [24] 2023  |                  | R=-0.28, p=0.01  |                                      | R=0.13, p=0.23                  |                                      |                               |
| Gill [46] 2023       |                  |                  | R=0.34, p=0.02                       | R=0.47, p=0.001                 |                                      | R=0.23, p=0.08                |

\* mean ± SD or median (range or interquartile range).

†Statistics : R, Pearson correlation coefficient; r, Spearman's rank correlation

AST, aspartate transaminase; ALT, alanine transaminase; APRI, aspartate aminotransferase-to-platelet ratio index; Alb, albumin; ALP, Alkaline phosphatase; Bil, bilirubin, CT, computerized tomography; Ex, examination; GGT, gamma-glutamyl transferase; INR, international normalized ratio; MELD-XI, Model for End-Stage Liver Disease excluding INR; MRE, magnetic resonance elastography; MRI, magnetic resonance imaging; Fib-4, fibrosis 4 index; N, total number of patients; n, number of cases underwent testing; PAWP, pulmonary arterial wedge pressure; Ped, pediatrics; Prosp, prospective; Retro, retrospective; SWE, shear wave elastography; TE, transient elastography

## Supplementary Figure 1: Subgroup analysis of Fontan duration for mild and severe liver fibrosis.

### (a) Studies on adults

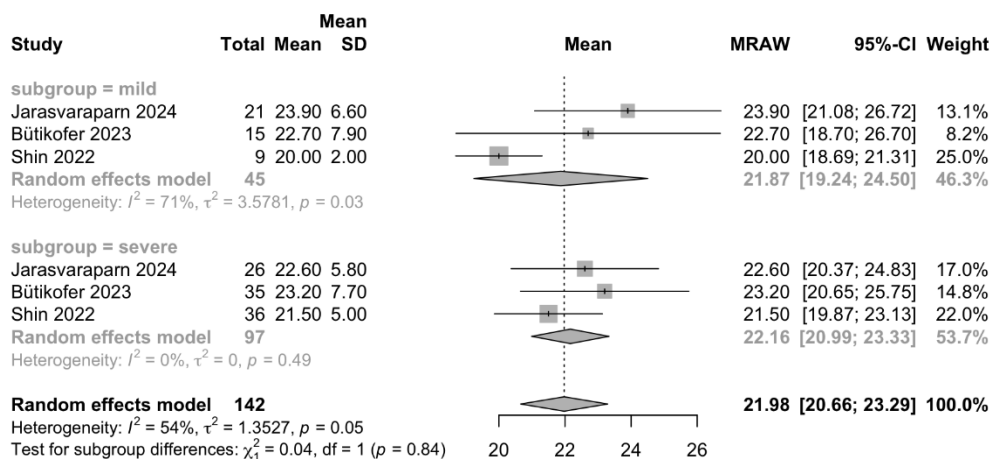

### (b) Studies on pediatrics

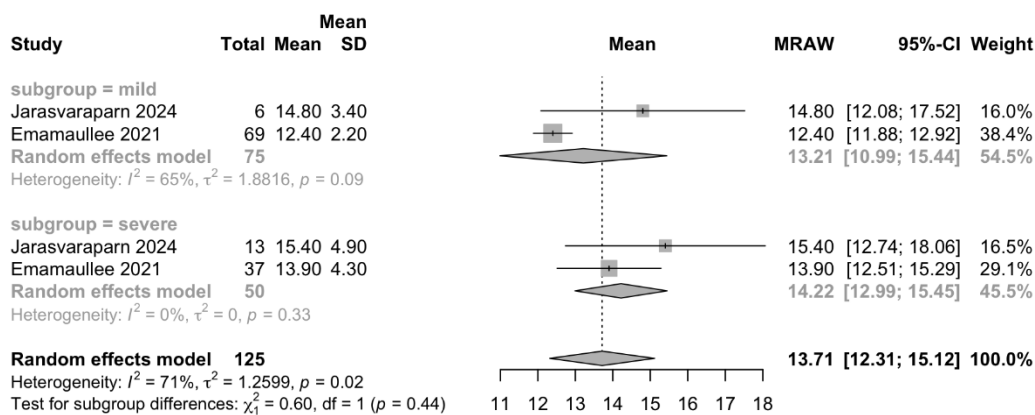

This forest plot shows the mean of Fontan duration (years) across studies. Each study is represented by a square, with size indicating its weight (based on sample size), and horizontal lines showing the 95% confidence intervals (CI). The diamond represents the pooled mean duration with its width indicating the 95% CI. The  $I^2$  statistic measures heterogeneity, and the p-value tests the statistical significance of the pooled estimate. CI, confidential interval; MRAW, meta-analysis random-effects Weights; SD, standard deviation



## Supplementary Figure 2: Subgroup analysis of age at Fontan operation for mild and severe liver fibrosis

### A. Studies with adults

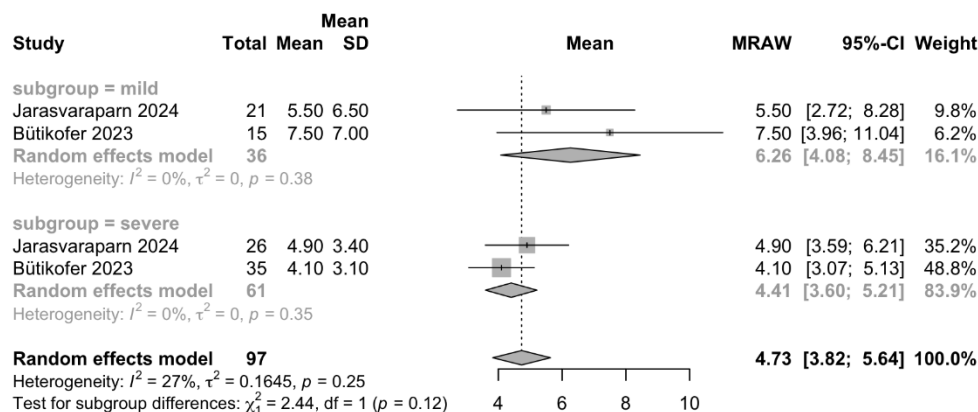

### B. Studies with pediatrics

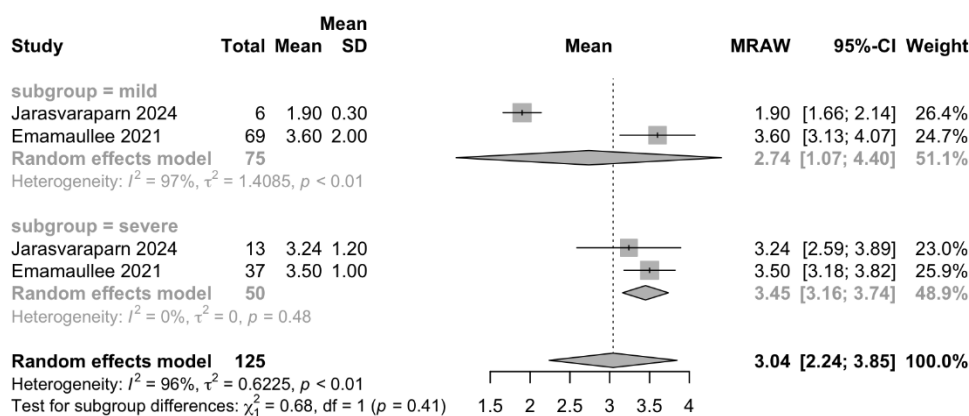

This forest plot shows the mean of age (years) at the Fontan operation across studies. Each study is represented by a square, with size indicating its weight (based on sample size), and horizontal lines showing the 95% confidence intervals (CI). The diamond represents the pooled mean duration with its width indicating the 95% CI. The  $I^2$  statistic measures heterogeneity, and the p-value tests the statistical significance of the pooled estimate.

CI, confidential interval; MRAW, meta-analysis random-effects Weights; SD, standard deviation

### Supplementary Figure 3: Subgroup analysis of Fontan pressure for mild and severe liver fibrosis.

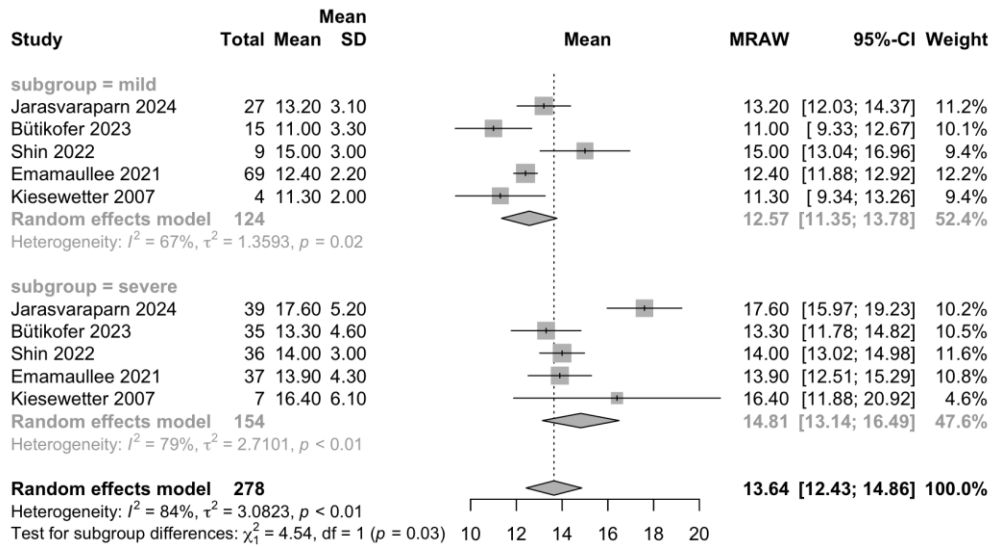

This forest plot shows the mean of Fontan pressure (mmHg) across studies. Each study is represented by a square, with size indicating its weight (based on sample size), and horizontal lines showing the 95% confidence intervals (CI). The diamond represents the pooled mean duration with its width indicating the 95% CI. The  $I^2$  statistic measures heterogeneity, and the p-value tests the statistical significance of the pooled estimate. CI, confidential interval; MRAW, meta-analysis random-effects Weights; SD, standard deviation

## Supplementary Figure 4: Subgroup analysis of hematologic factors for mild and severe liver fibrosis.

### A. Platelet ( $\times 10^3/\mu\text{L}$ )

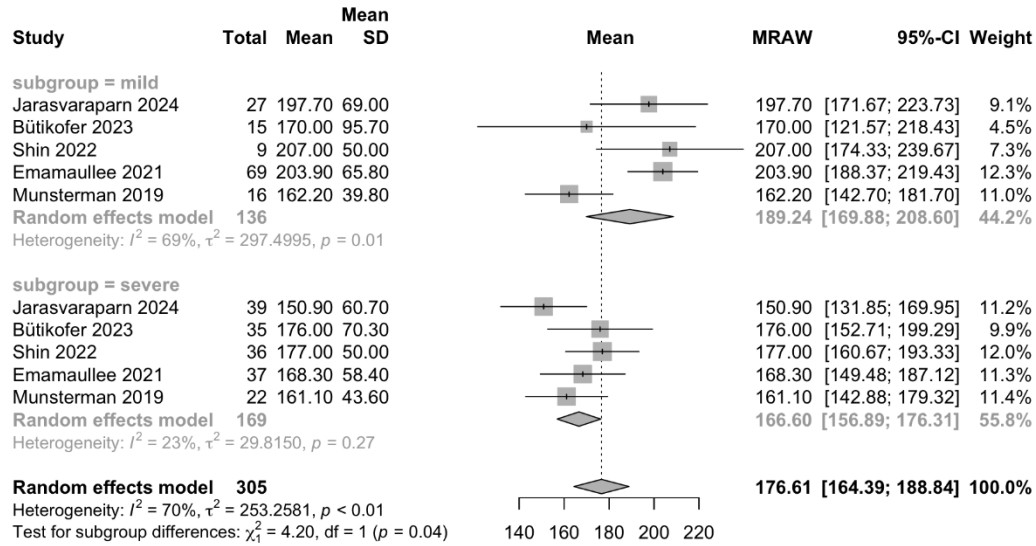

### B. GGT (IU/L)

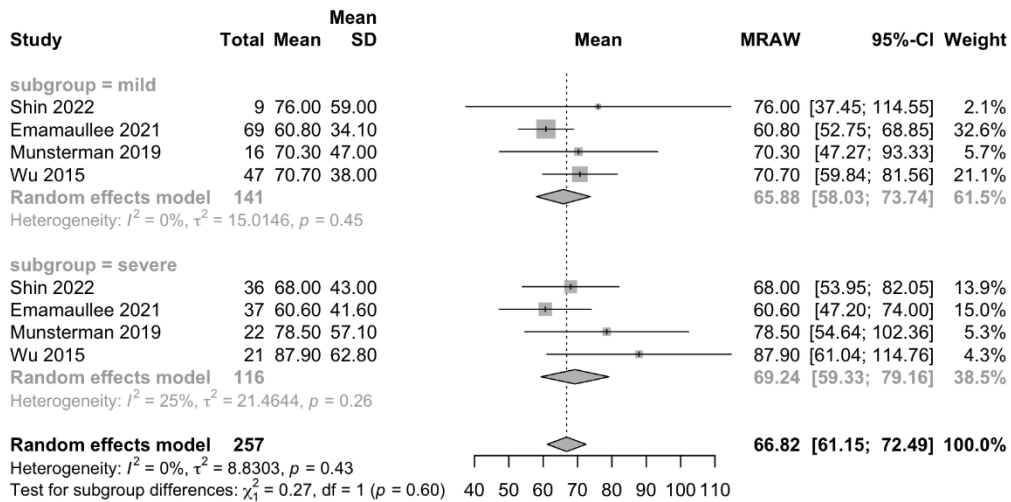

C. Total bilirubin (mmol/L)

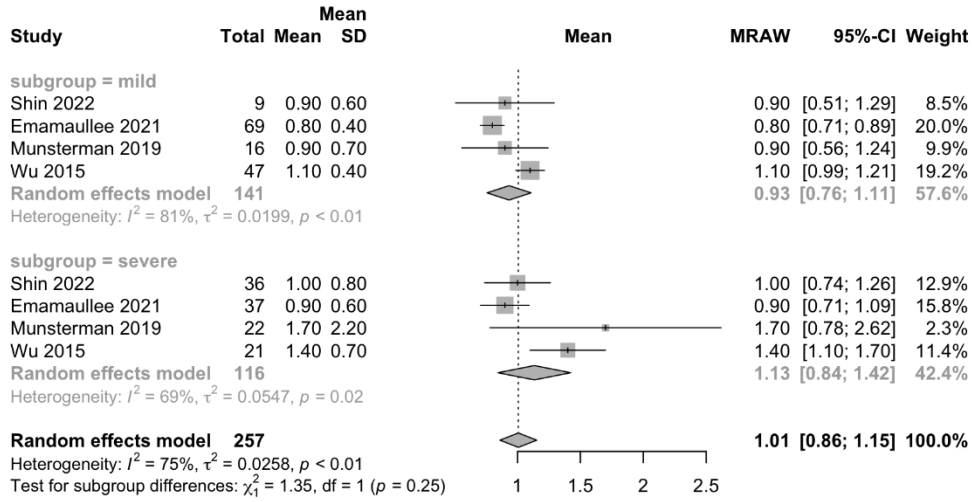

D. APRI

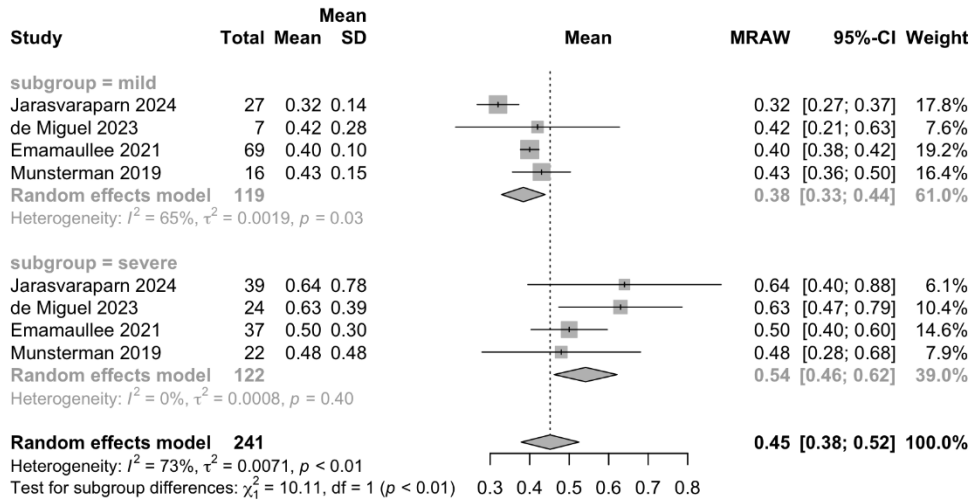

E. Fib-4

(a) Studies on adults

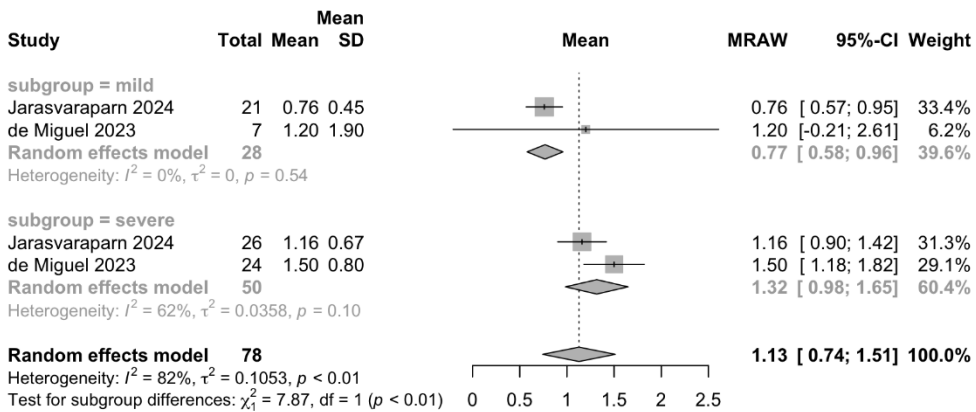

(b) Studies on pediatrics

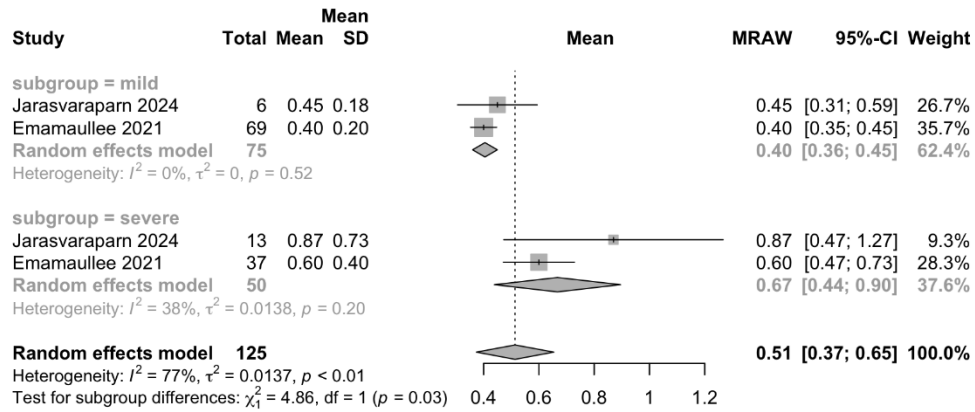

F. MELD-XI

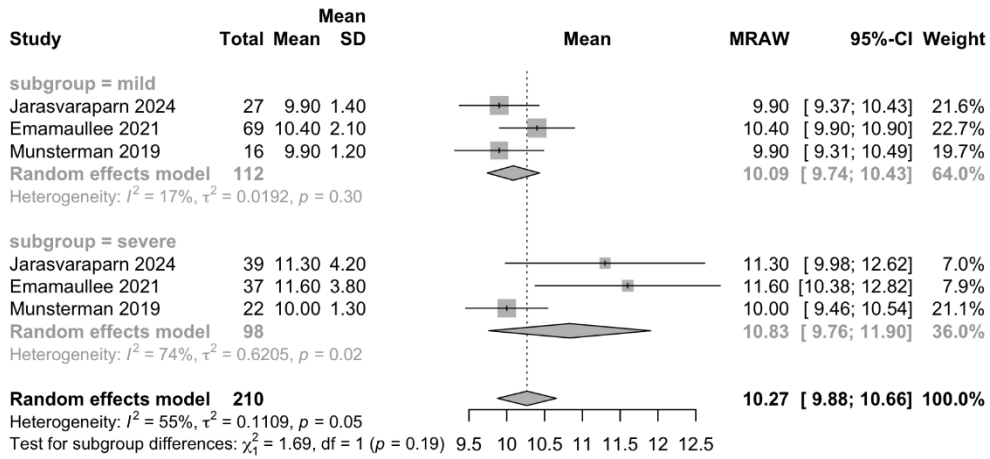

This forest plot shows the mean hematologic factors across studies. Each study is represented by a square, with size indicating its weight (based on sample size), and horizontal lines showing the 95% confidence intervals (CI). The diamond represents the pooled mean duration with its width indicating the 95% CI. The  $I^2$  statistic measures heterogeneity, and the p-value tests the statistical significance of the pooled estimate.

APRI, Aspartate Aminotransferase to Platelet Ratio Index; CI, confidential interval; Fib-4, Fibrosis-4 Index; GGT, Gamma-Glutamyl Transferase, MELD, Model for End-Stage Liver Disease; MRAW, meta-analysis random-effects Weights; SD, standard deviation
